# Supplementary material for: Combining Web-Based Gamification and Physical Nudges With an App (MoveMore) to Promote Walking Breaks and Reduce Sedentary Behavior of Office Workers: Field Study
Source: PubMed Central journal article supplement (PMC8076996; doi:10.2196/19875), 2021-04-12
Supplement: jmir_v23i4e19875_app3.pdf [file jmir_v23i4e19875_app3.pdf]

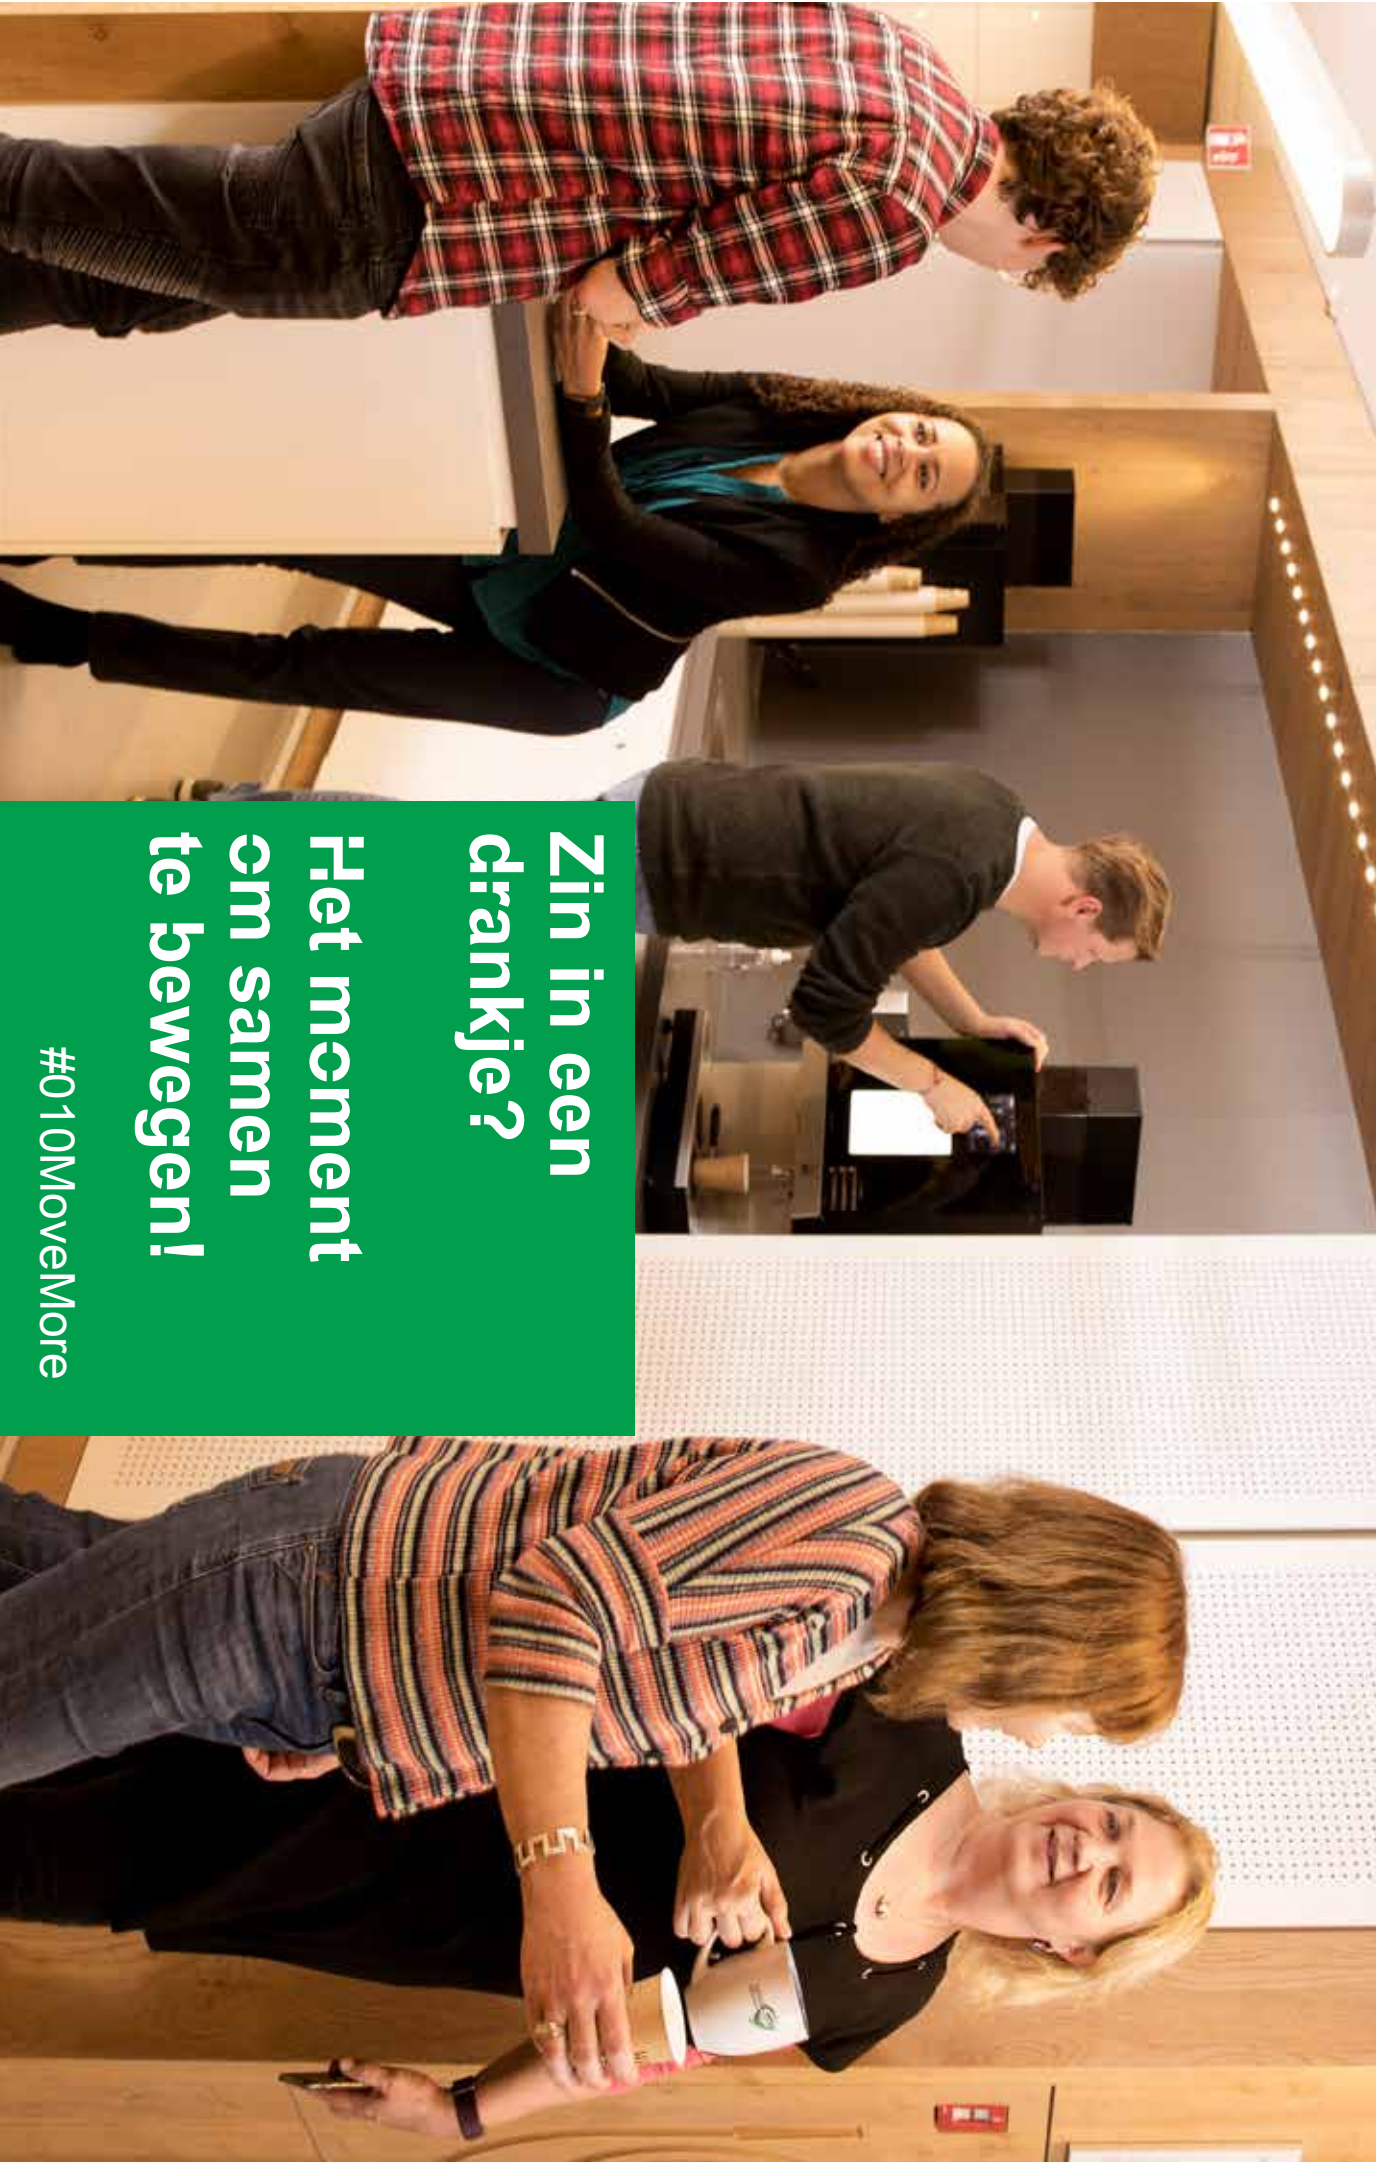

Zin in een  
drankje?

Het moment  
om samen  
te bewegen!

#010MoveMore

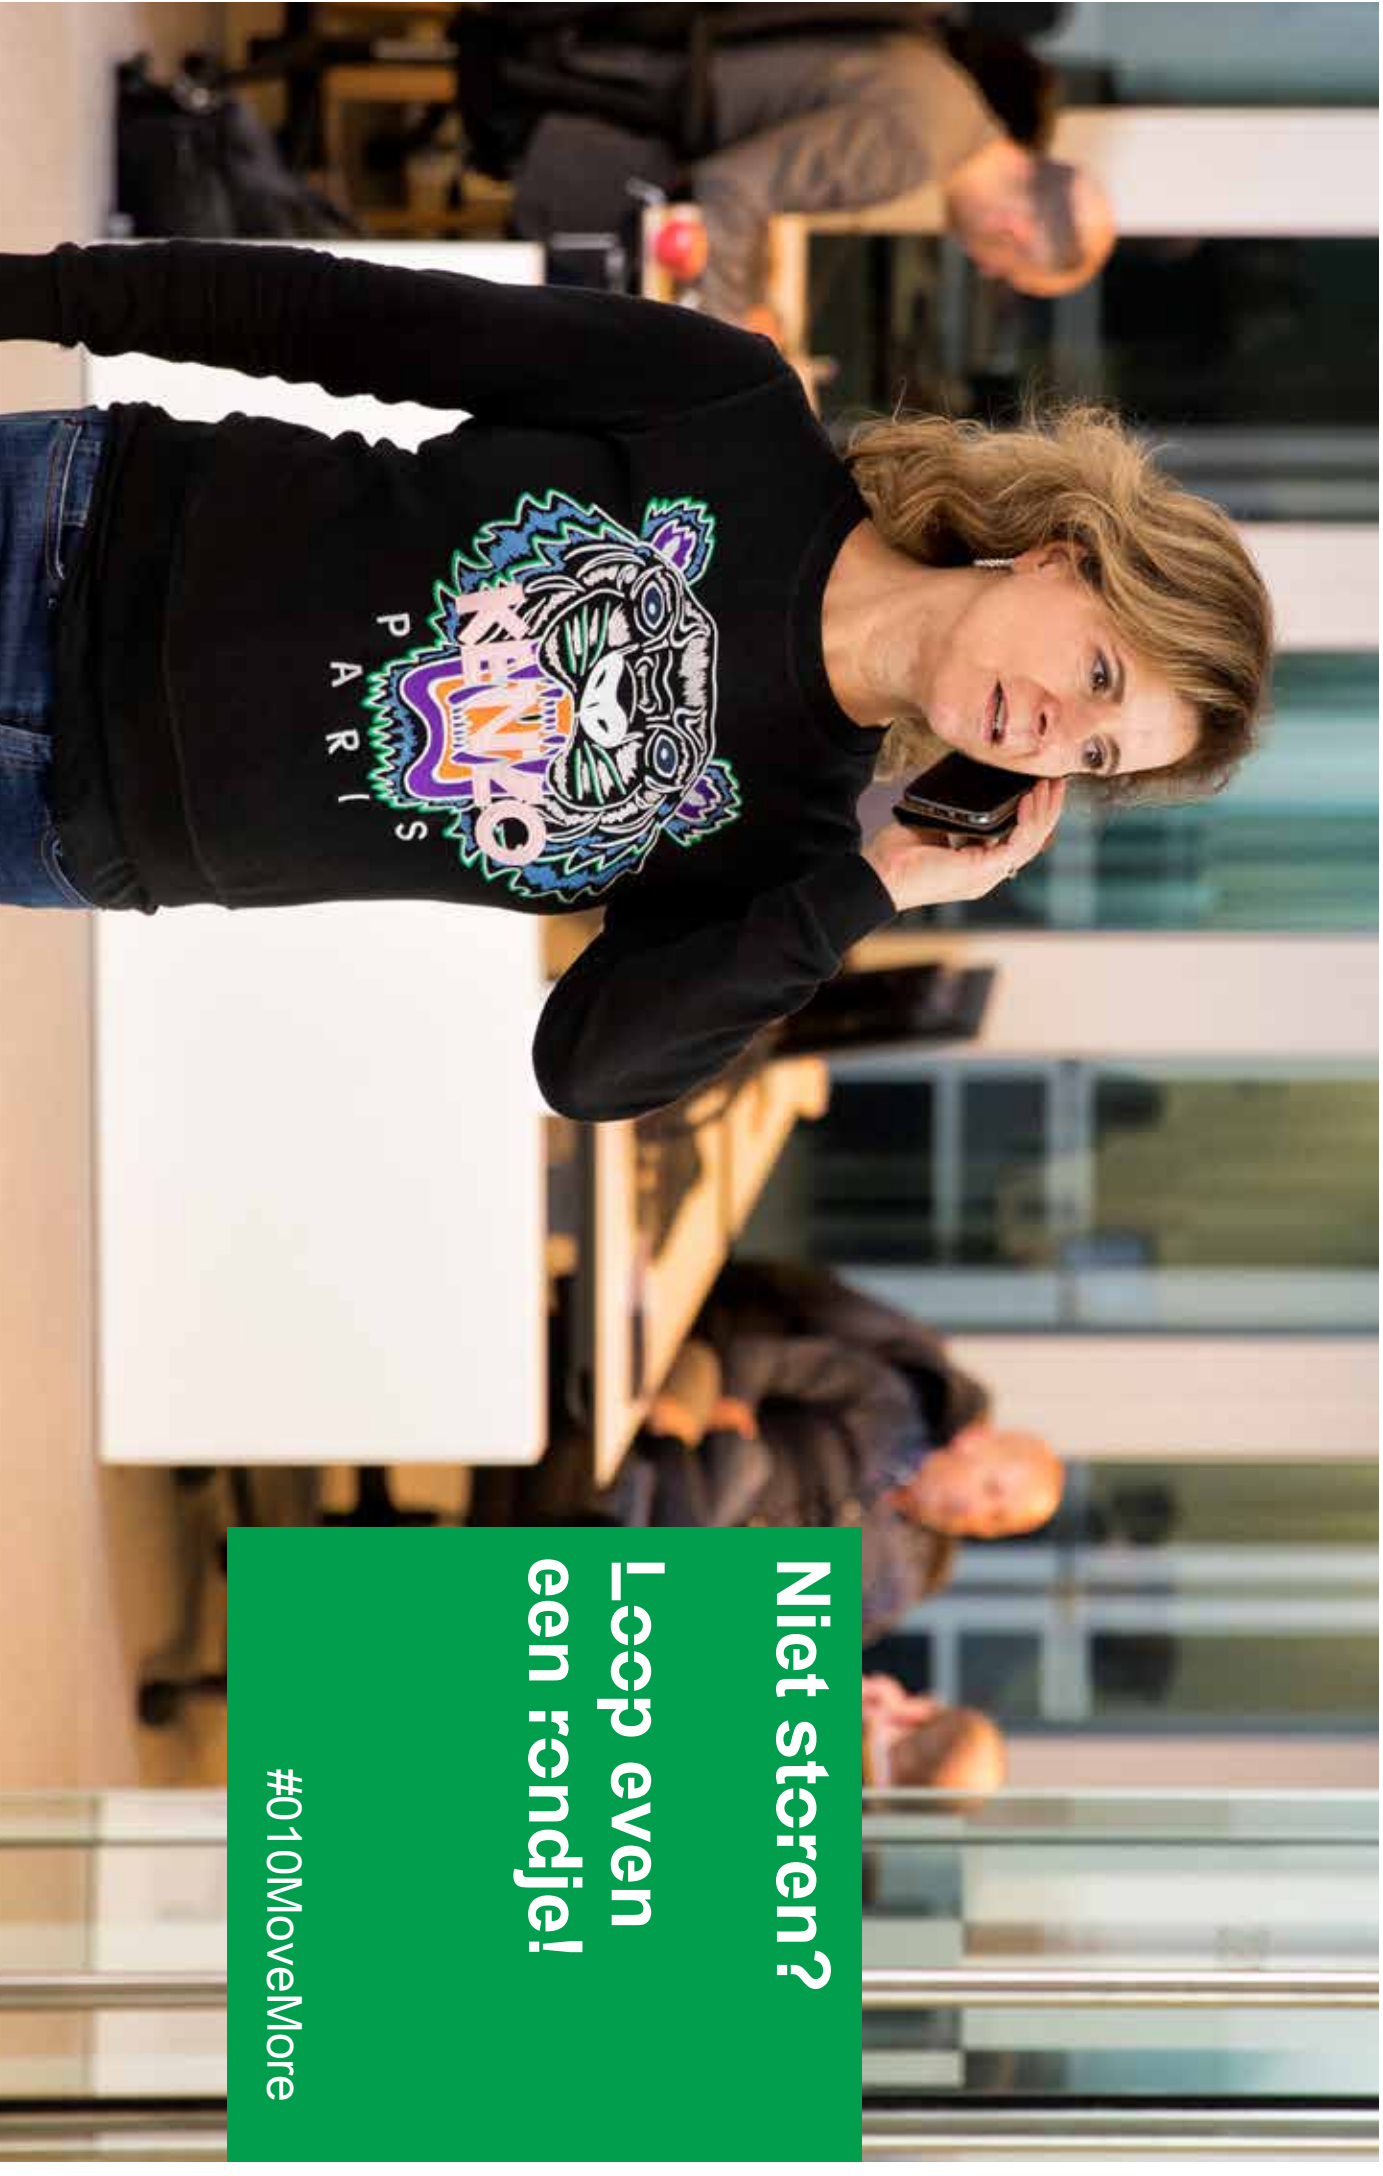

**Niet storen?**

**Loop even  
een rondje!**

**#010MoveMore**

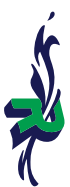

Gemeente Rotterdam

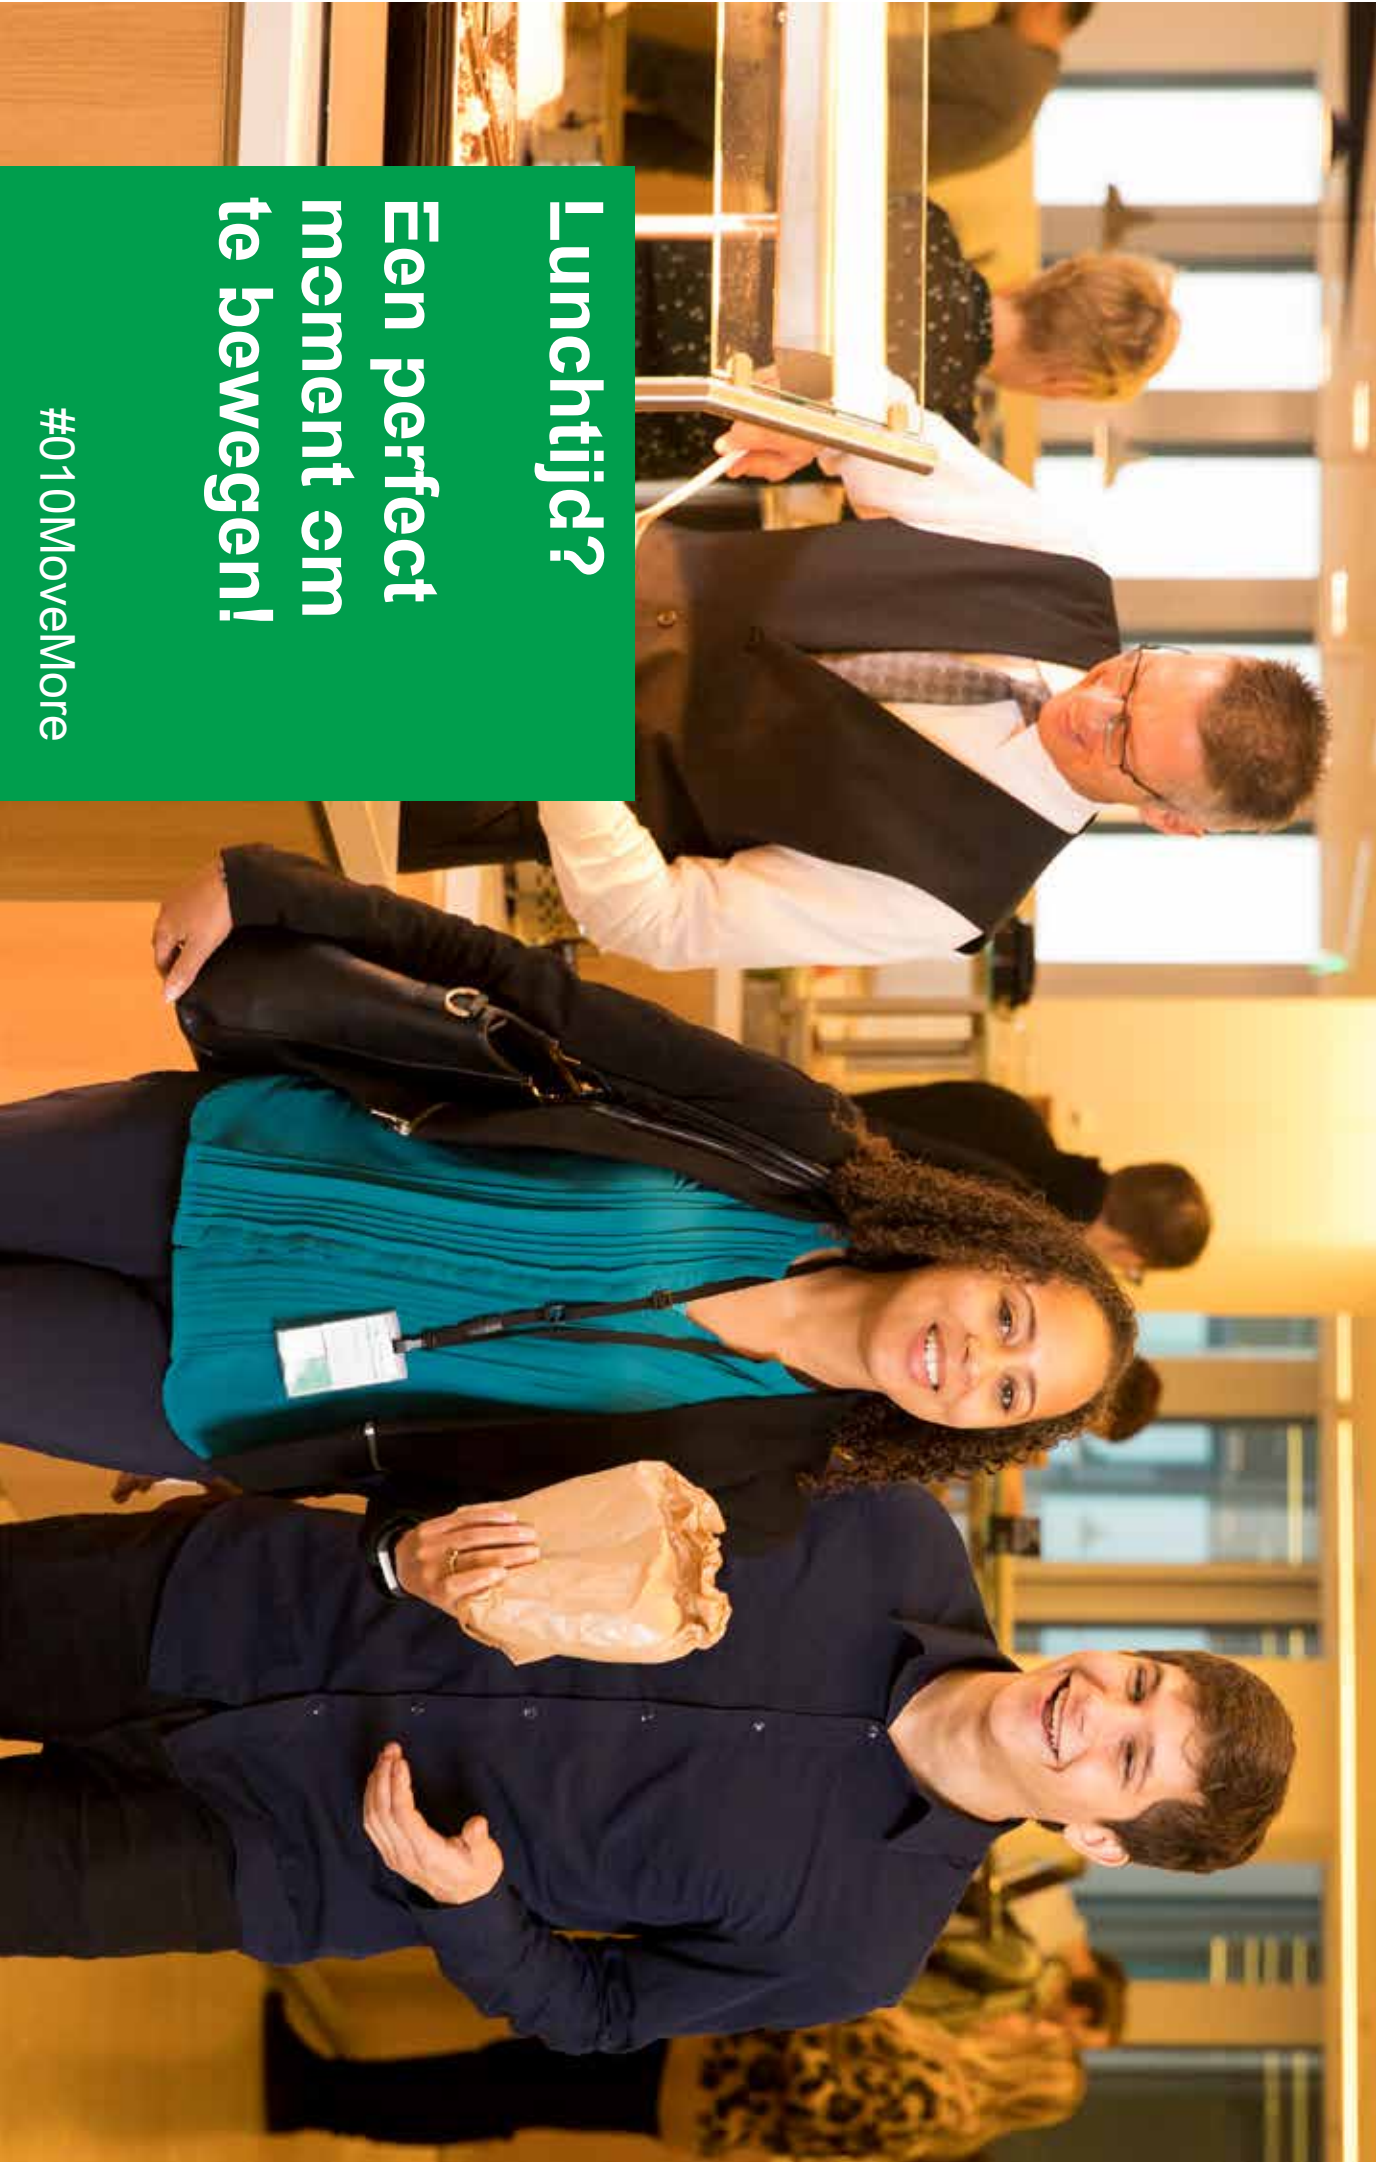

Lunchtijd?

Een perfect  
moment om  
te bewegen!

#010MoveMore



Gemeente Rotterdam

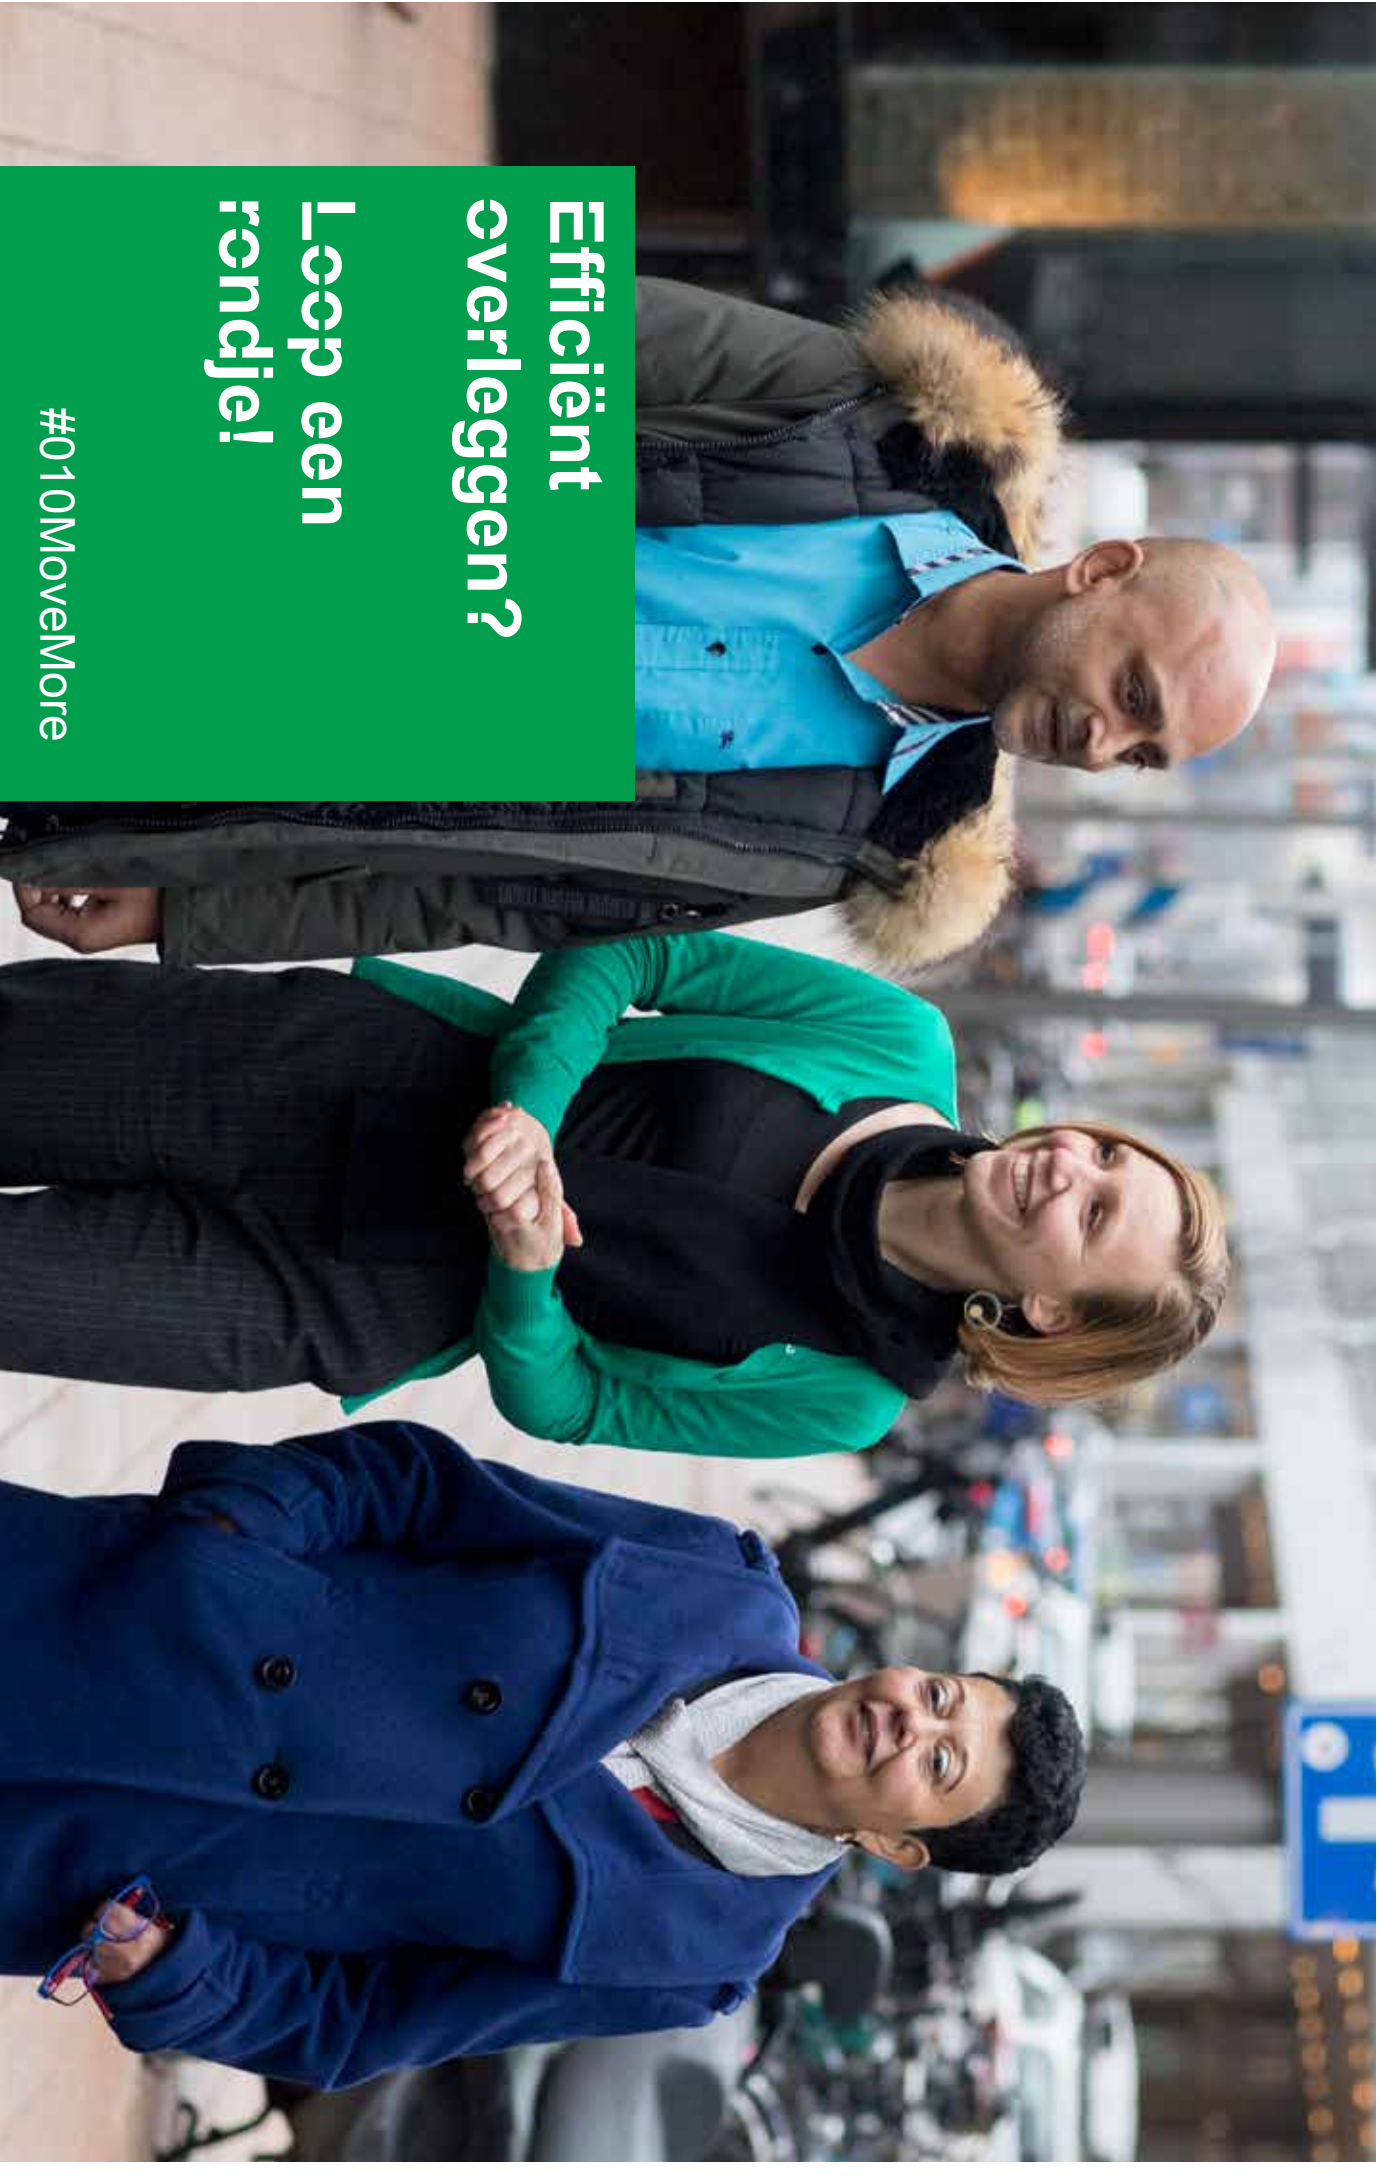

**Efficiënt  
overleggen?**

**Loop een  
rondje!**

**#010MoveMore**

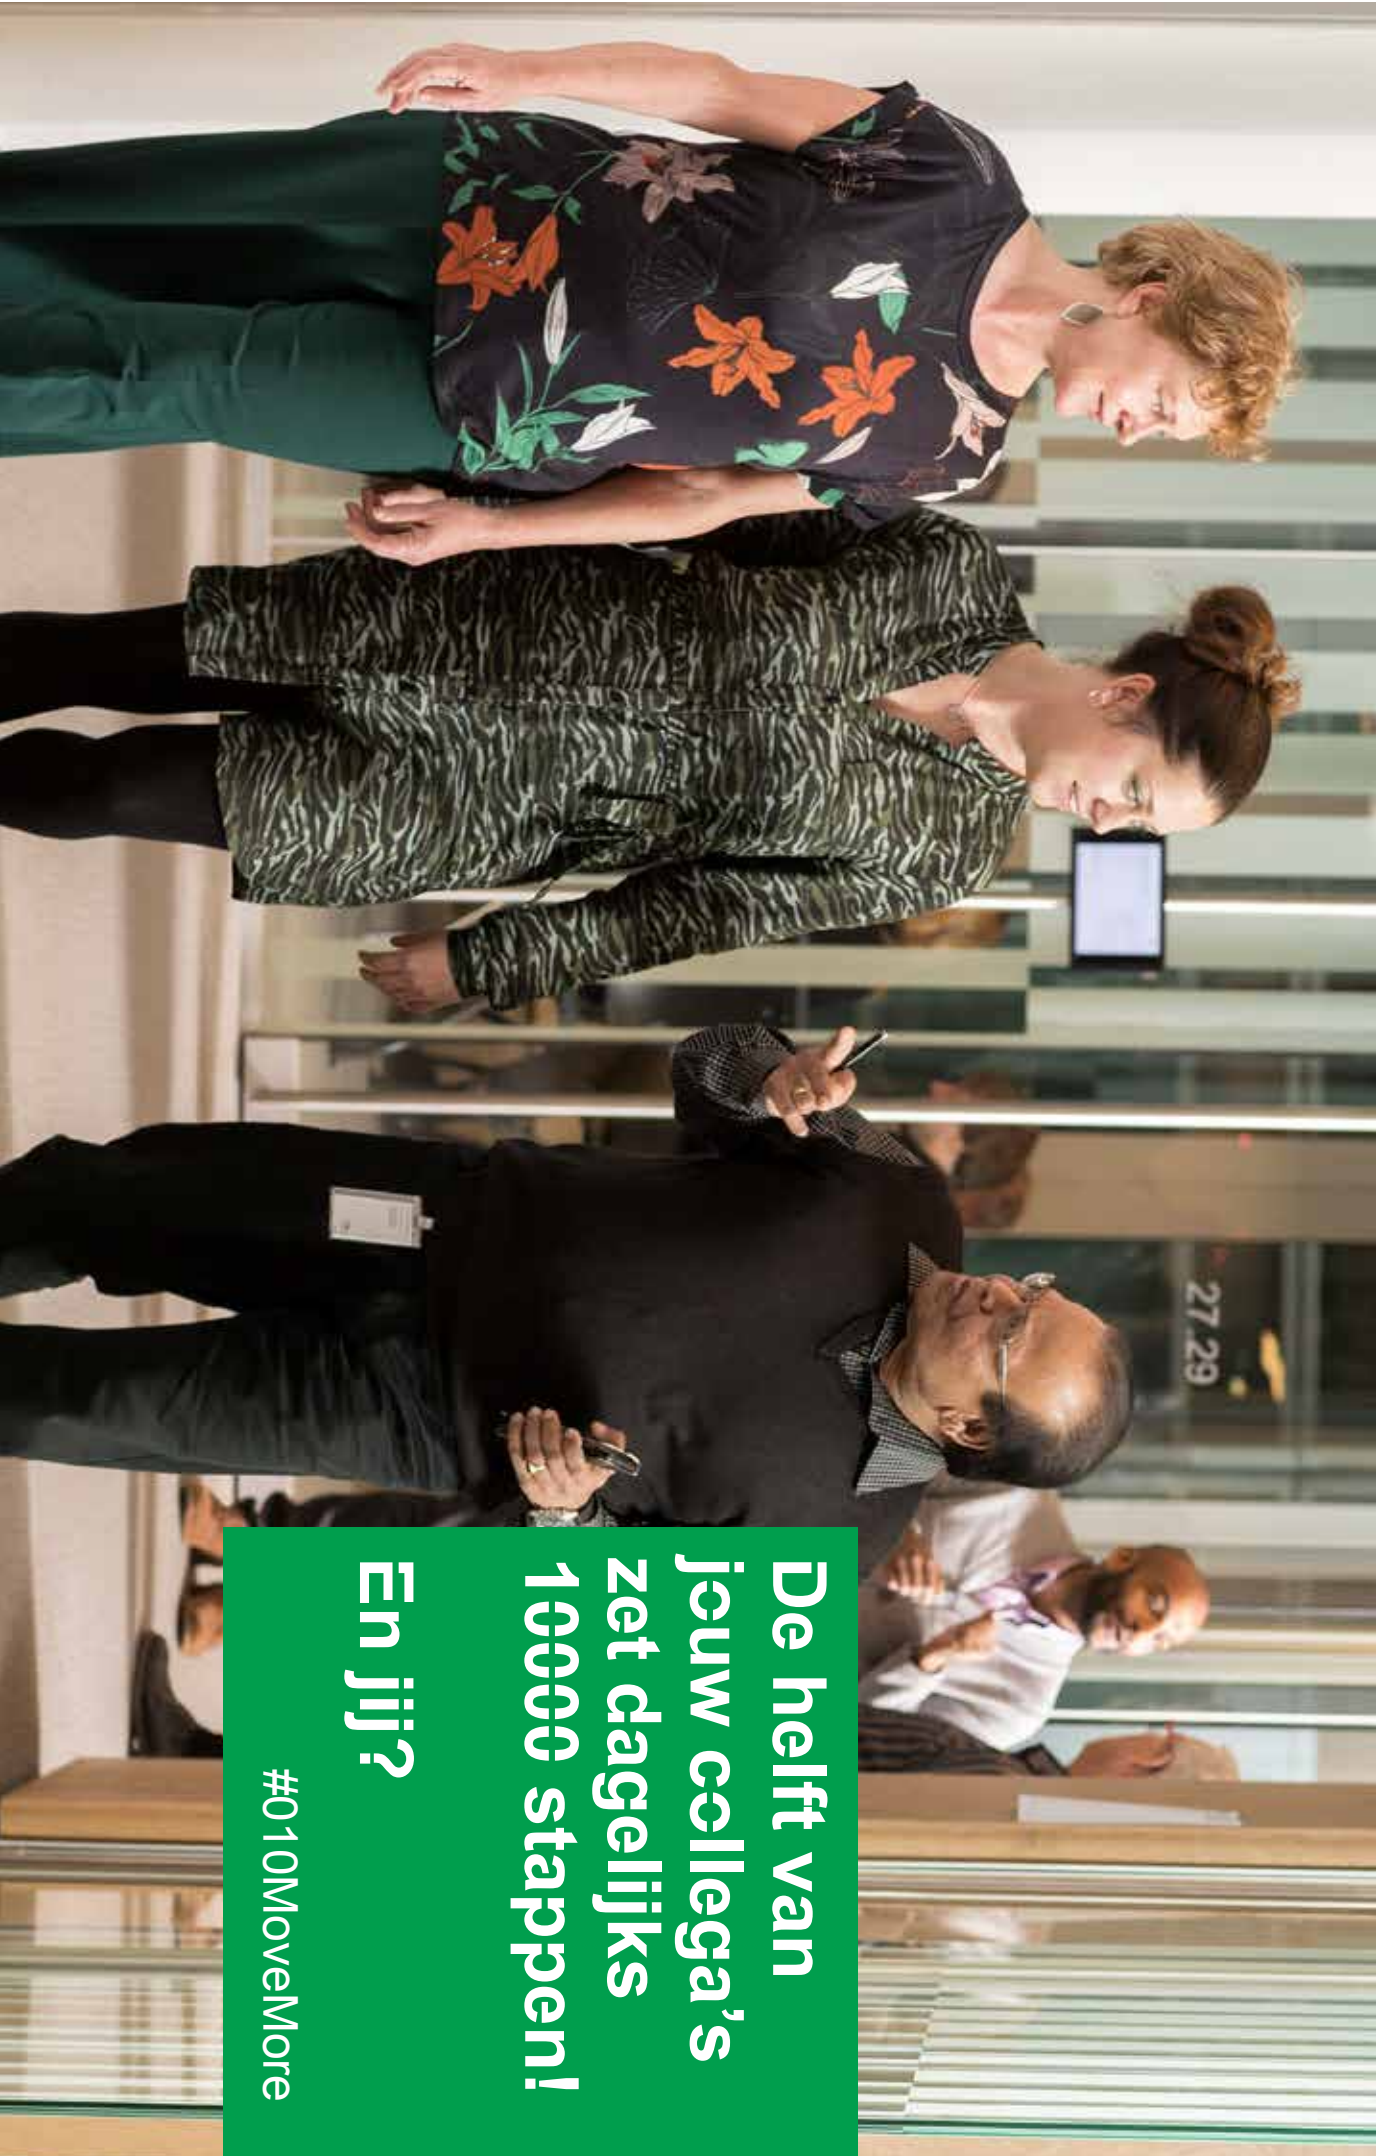

**De helft van  
jouw collega's  
zet dagelijks  
10000 stappen!  
En jij?  
#010MoveMore**

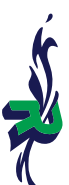

**Gemeente Rotterdam**

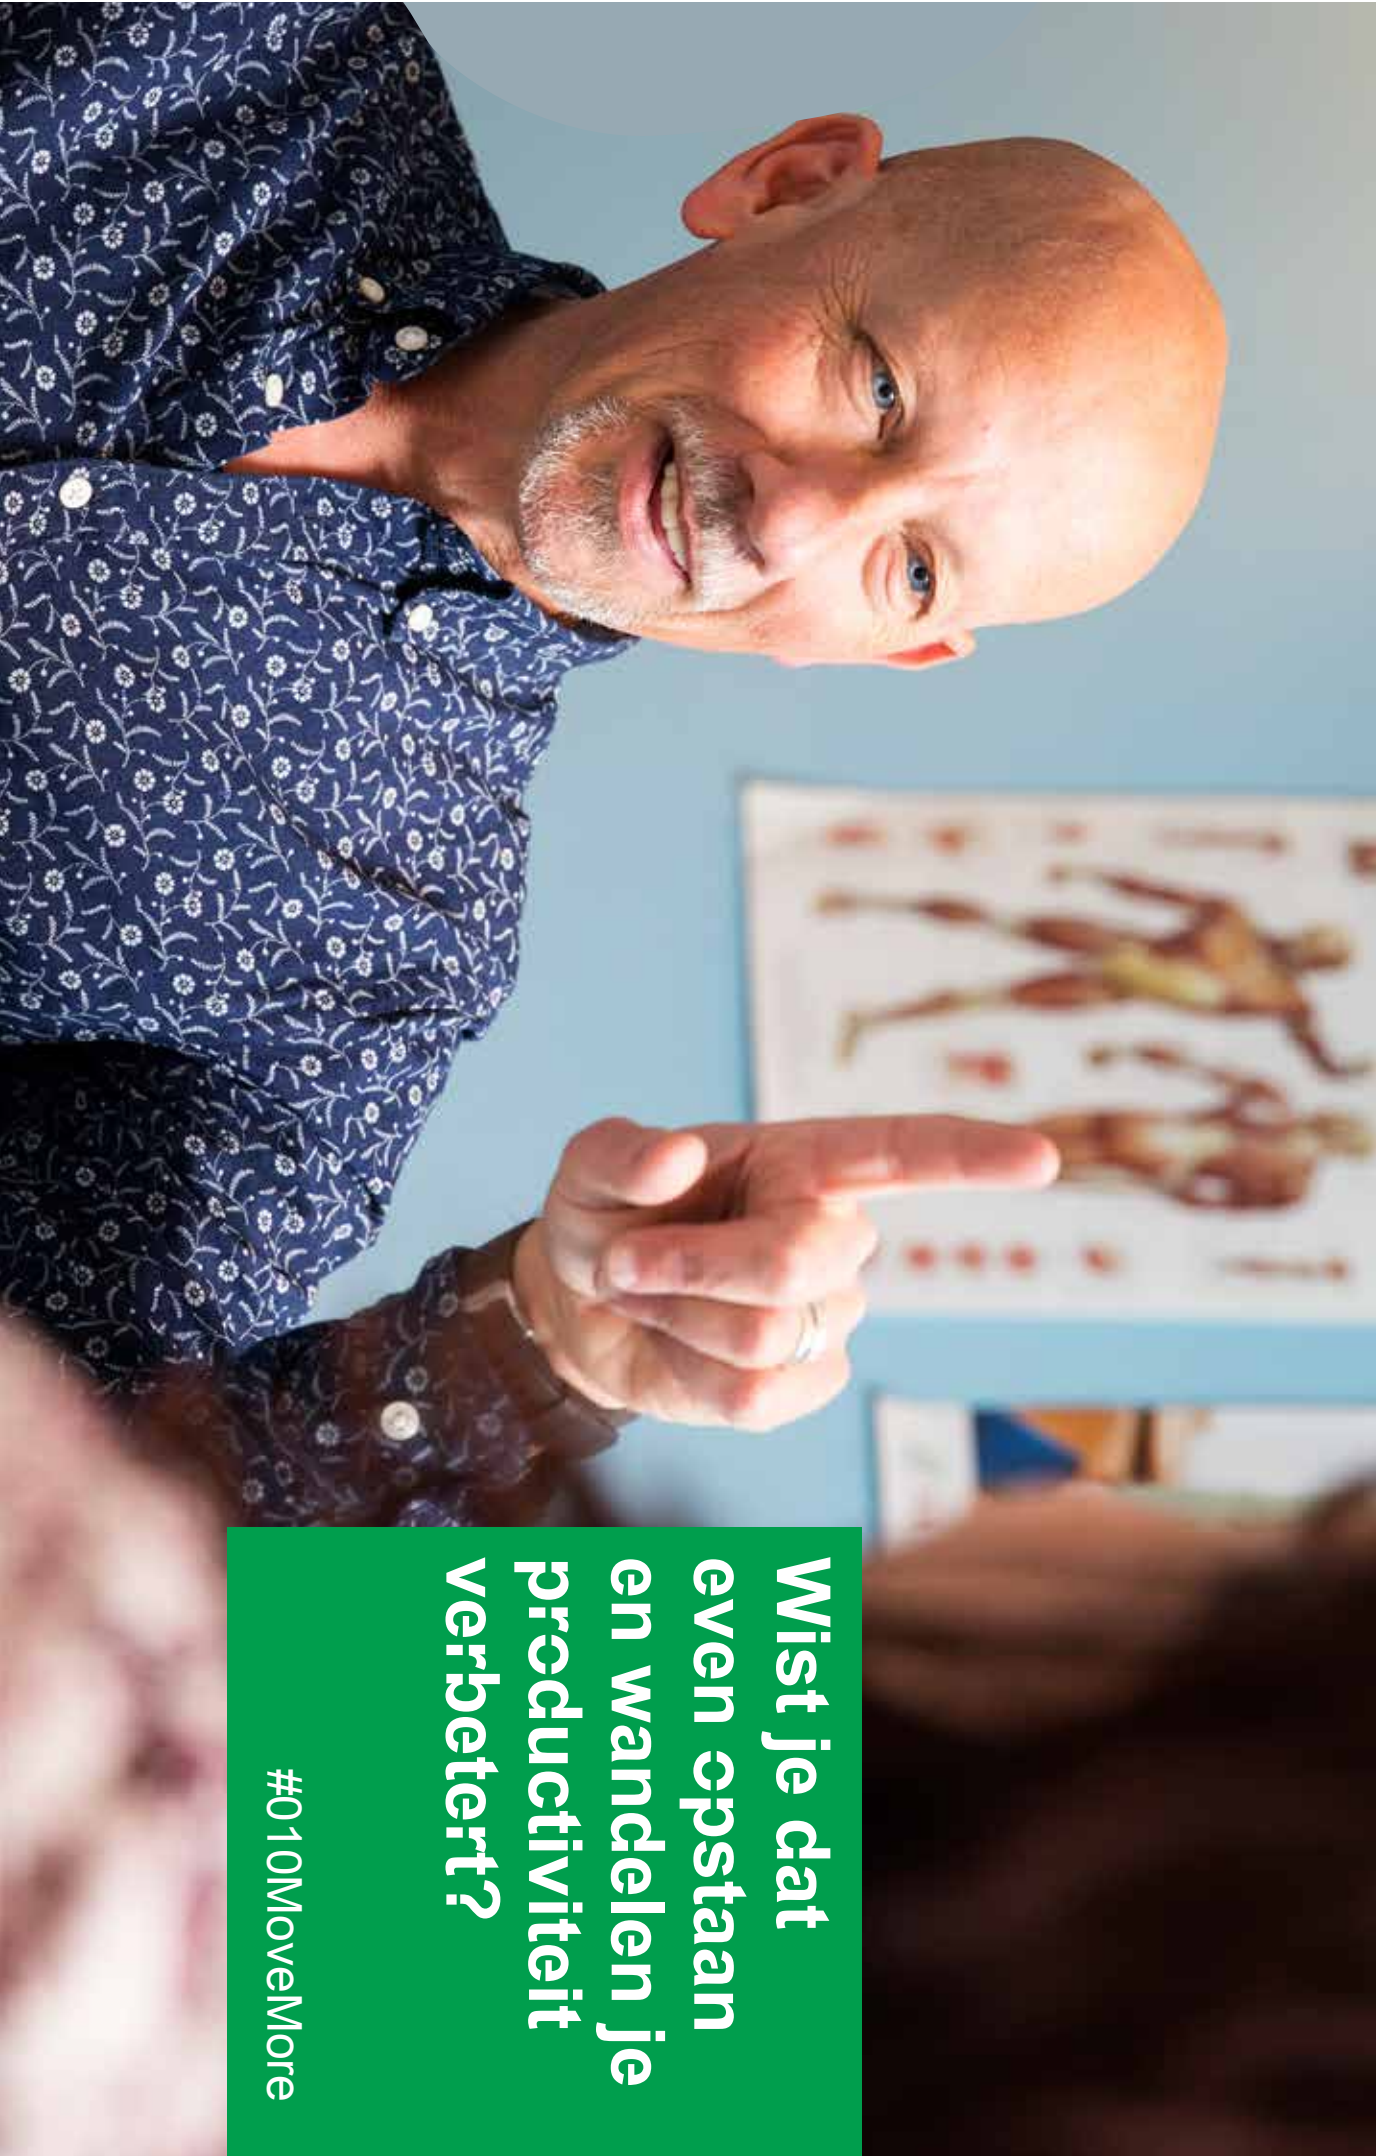

**Wist je dat  
even opstaan  
en wandelen je  
productiviteit  
verbetert?**

**#010MoveMore**



**Gemeente Rotterdam**

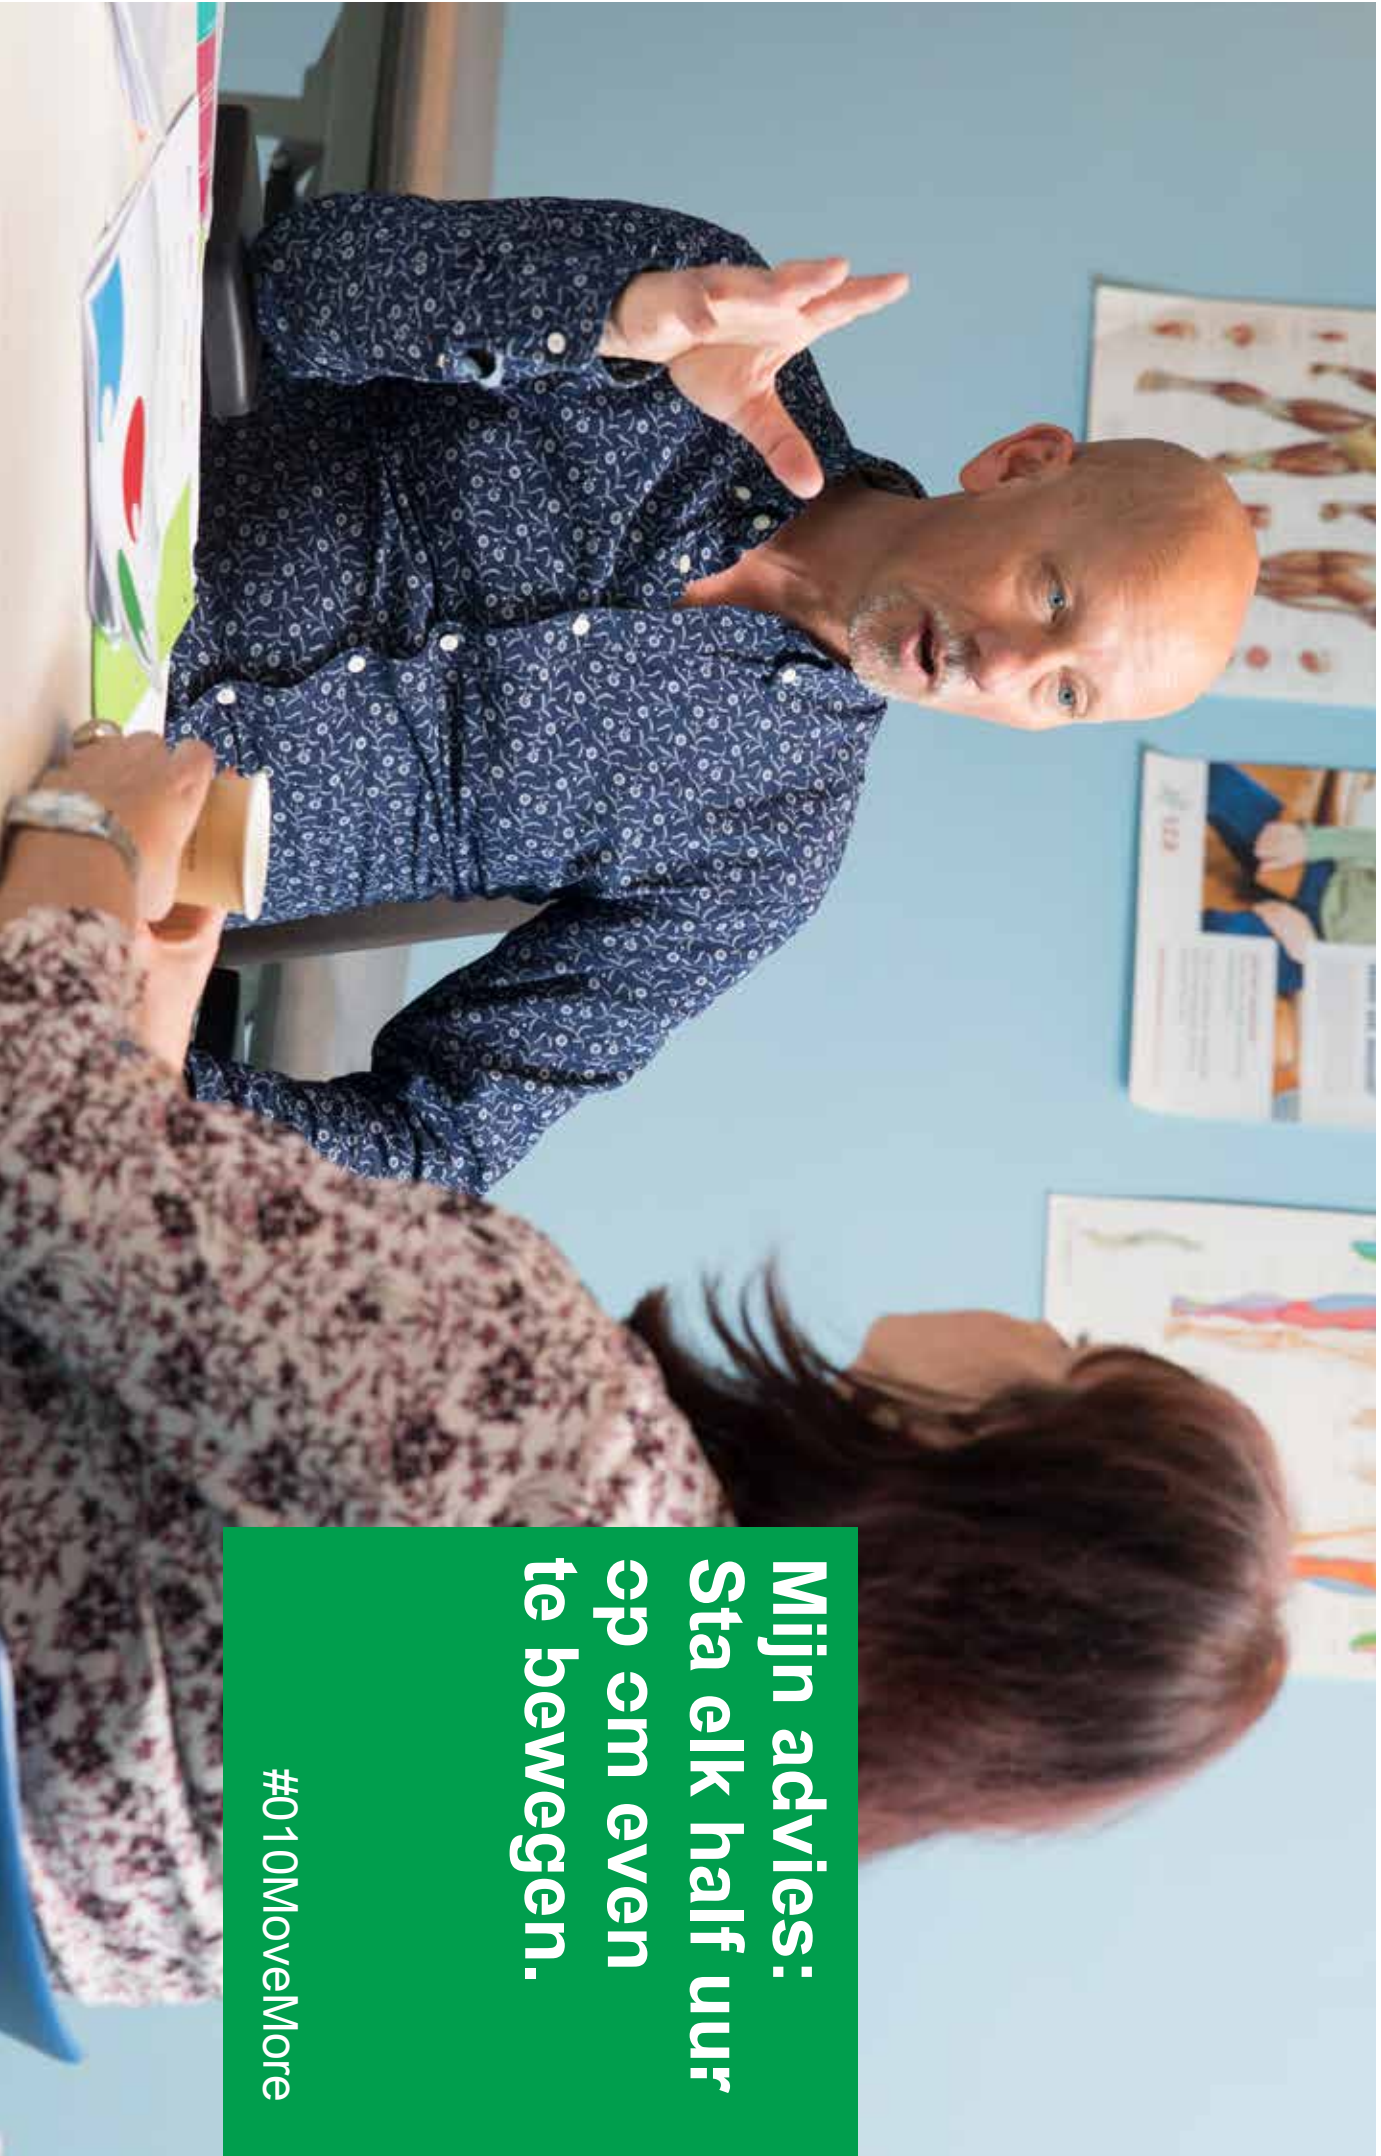

**Mijn advies:  
Sta elk half uur  
op om even  
te bewegen.**

**#010MoveMore**



**Gemeente Rotterdam**
